# Supplementary material for: High efficiency and long lifetime fluorescent white organic light-emitting diodes by phosphor sensitization to strategically manage singlet and triplet excitons
Source: Royal Society of Chemistry journal article supplement (doi:10.1039/d1tc00113b), 2021-01-01
Supplement: d1tc00113b1.pdf [file d1tc00113b1.pdf]

## **High efficiency and long lifetime fluorescent white organic light-emitting diodes by phosphor sensitization to strategically manage singlet and triplet excitons**

Jingwen Yao<sup>a</sup>, Wei Liu<sup>b</sup>, Chengwei Lin<sup>a</sup>, Qian Sun<sup>a</sup>, Yanfeng Dai<sup>a</sup>, Xianfeng Qiao<sup>a</sup>, Dezhi Yang<sup>a</sup>, Jiangshan Chen<sup>a</sup> and Dongge Ma<sup>\*a</sup>

<sup>a</sup>Institute of Polymer Optoelectronic Materials and Devices, Guangdong Provincial Key Laboratory of Luminescence from Molecular Aggregates, State Key Laboratory of Luminescent Materials and Devices, South China University of Technology, Guangzhou 510640, People's Republic of China.

E-mail: [msdgma@scut.edu.cn](mailto:msdgma@scut.edu.cn)

<sup>b</sup>Key Laboratory of Functional Inorganic Material Chemistry, Ministry of Education, School of Chemistry and Material Science, Heilongjiang University, 74 Xuefu Road, Harbin 150080, People's Republic of China.

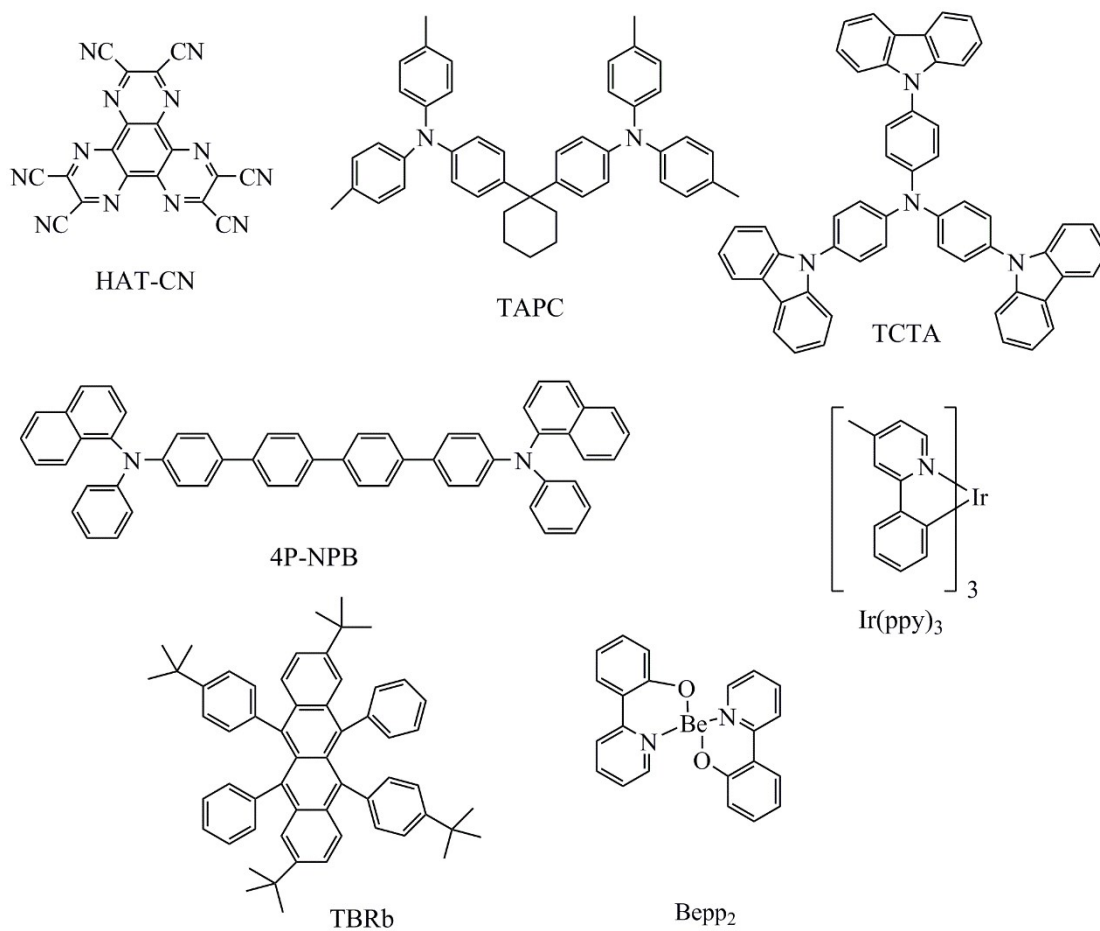

**Fig. S1** Molecular structures of the materials used in this work.

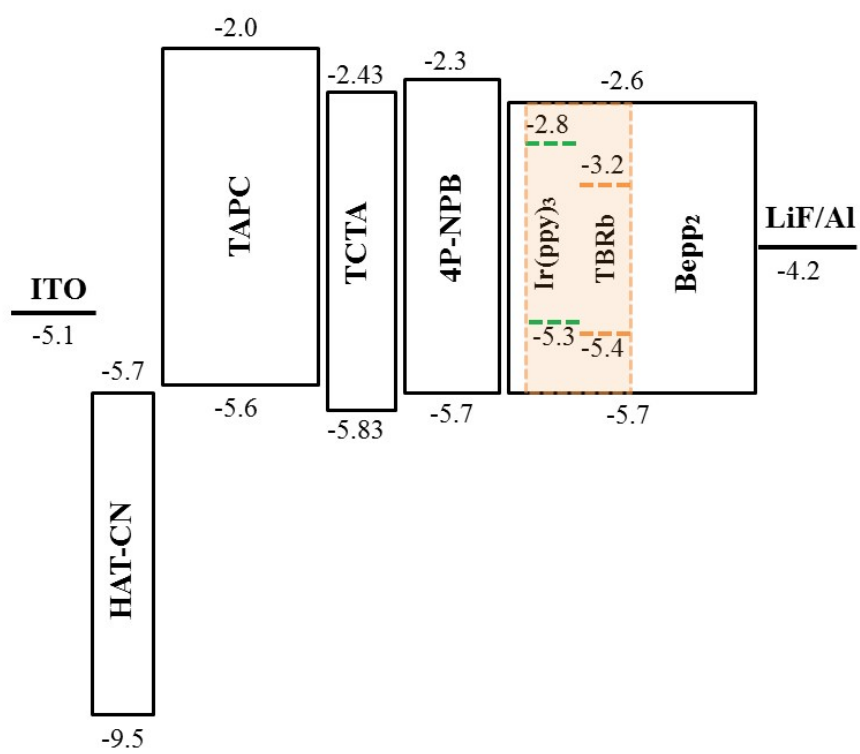

**Fig. S2** Proposed energy level diagram of the resulting fluorescent WOLEDs.

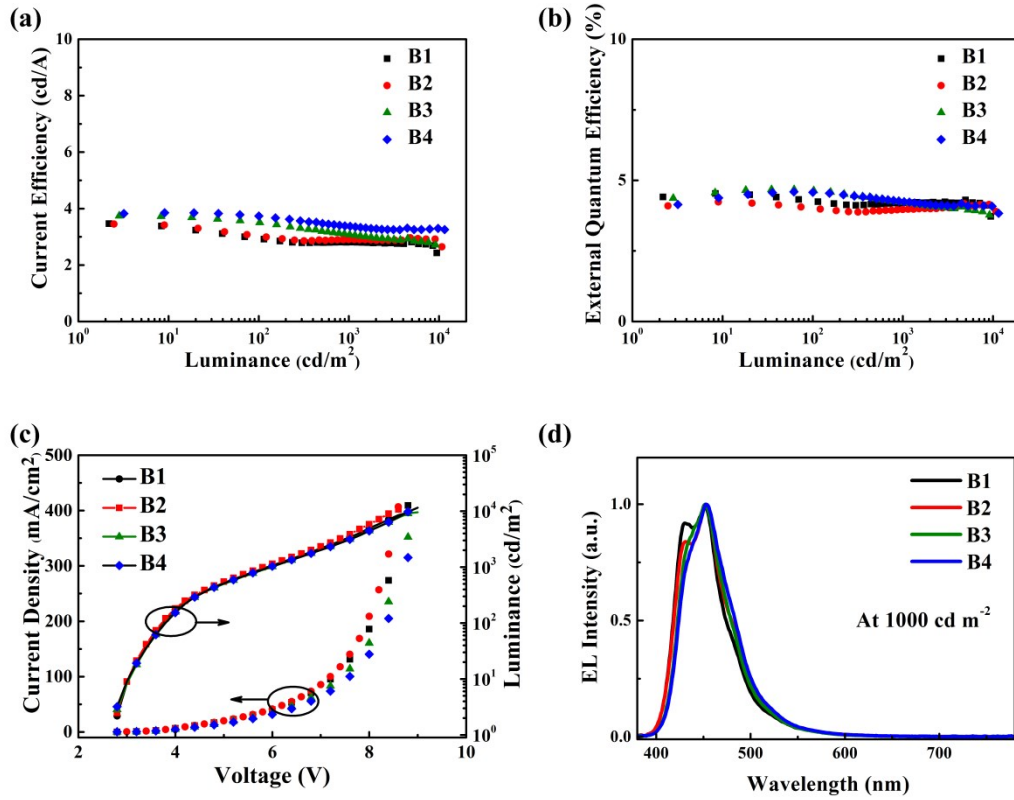

**Fig. S3** EL performances of the resulting blue OLEDs with different EML structures. (a) CE-luminance characteristics. (b) EQE-luminance characteristics. (c) Current density-luminance-voltage characteristics. (d) EL spectra at the luminance of 1000 cd m<sup>-2</sup>. The device structures are ITO/HAT-CN (15 nm)/TAPC (60 nm)/TCTA (10 nm)/EMLs (X nm)/Bepp<sub>2</sub> (50 nm)/LiF (1 nm)/Al, where EMLs are 4P-NPB (10 nm), 4P-NPB (15 nm), 4P-NPB:Bepp<sub>2</sub> (1:1, 10 nm) and 4P-NPB:Bepp<sub>2</sub> (1:1, 15 nm), corresponding to devices B1, B2, B3 and B4, respectively.

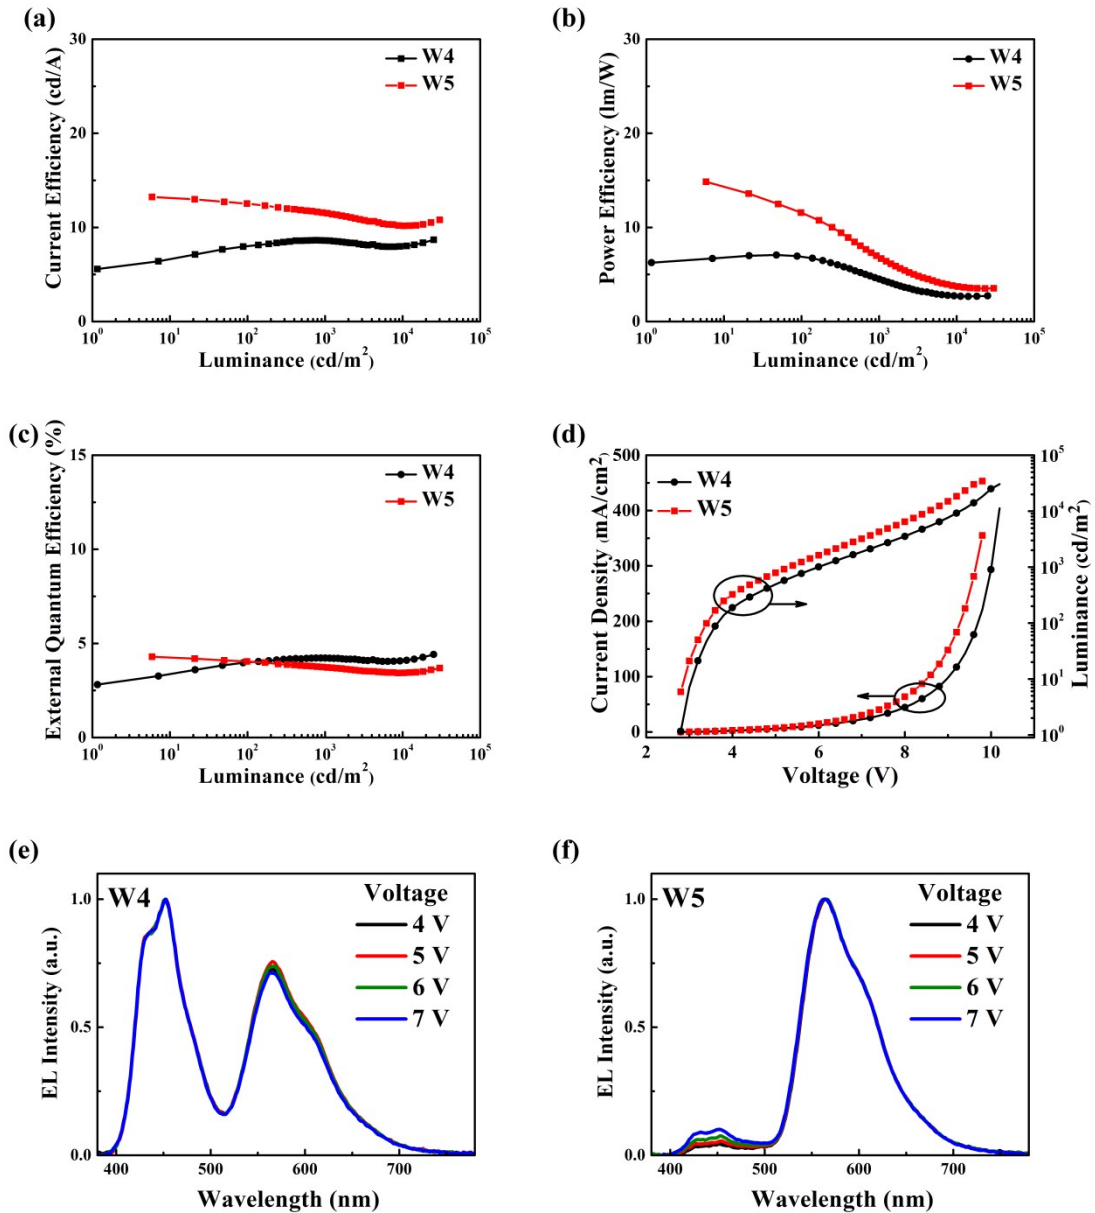

**Fig. S4** EL performances of the comparing WOLEDs (devices W4 and W5) with different EML structures. (a) CE-luminance characteristics. (b) PE-luminance characteristics. (c) EQE-luminance characteristics. (d) Current density-luminance-voltage characteristics. (e) EL spectra of device W4 at different voltages. (f) EL spectra of device W5 at different voltages. The device structures are ITO/HAT-CN (15 nm)/TAPC (60 nm)/TCTA (10 nm)/EMLs (X nm)/Bepp<sub>2</sub> (50 nm)/LiF (1 nm)/Al, where EMLs are 4P-NPB (6 nm)/4P-NPB:6%Ir(ppy)<sub>3</sub>:2%TBRb (3 nm)/4P-NPB (5 nm) and 4P-NPB (8 nm)/4P-NPB:6%Ir(ppy)<sub>3</sub>:2%TBRb (3 nm), corresponding to devices W4 and W5, respectively.

**Table S1.** Summary of the EL performances of the resulting blue and white OLEDs.

| Device | $V_{on}^{a)}$<br>(V) | Max CE <sup>b)</sup><br>( $cd A^{-1}$ ) | Max PE <sup>b)</sup><br>( $lm W^{-1}$ ) | Max EQE <sup>b)</sup><br>(%) | CIE <sup>c)</sup><br>(x, y) | Performance at the luminance of<br>1000/5000 $cd m^{-2}$ |                    |         |
|--------|----------------------|-----------------------------------------|-----------------------------------------|------------------------------|-----------------------------|----------------------------------------------------------|--------------------|---------|
|        |                      |                                         |                                         |                              |                             | CE ( $cd A^{-1}$ )                                       | PE ( $lm W^{-1}$ ) | EQE (%) |
| B1     | 2.8                  | 3.5                                     | 3.9                                     | 4.5                          | (0.15, 0.07)                | 2.8/2.7                                                  | 1.5/1.1            | 4.2/4.2 |
| B2     | 2.8                  | 3.5                                     | 3.9                                     | 4.2                          | (0.15, 0.08)                | 2.9/2.9                                                  | 1.5/1.2            | 4.0/4.1 |
| B3     | 2.8                  | 3.7                                     | 4.2                                     | 4.7                          | (0.15, 0.08)                | 3.1/2.9                                                  | 1.6/1.1            | 4.2/4.0 |
| B4     | 2.8                  | 3.9                                     | 4.3                                     | 4.6                          | (0.15, 0.09)                | 3.4/3.3                                                  | 1.8/1.2            | 4.2/4.1 |
| W4     | 2.8                  | 8.6                                     | 4.5                                     | 4.2                          | (0.31, 0.28)                | 8.6/8.0                                                  | 4.5/2.9            | 4.2/4.0 |
| W5     | 2.8                  | 13.2                                    | 14.8                                    | 4.3                          | (0.46, 0.49)                | 11.5/10.4                                                | 6.7/4.2            | 3.7/3.5 |

<sup>a)</sup> The voltages estimated at 1  $cd m^{-2}$ , <sup>b)</sup> CE, PE and EQE correspond to current efficiency, power efficiency and external quantum efficiency, <sup>c)</sup> Commission International de L'clairage (CIE) measured at the luminance of 1000  $cd m^{-2}$ .

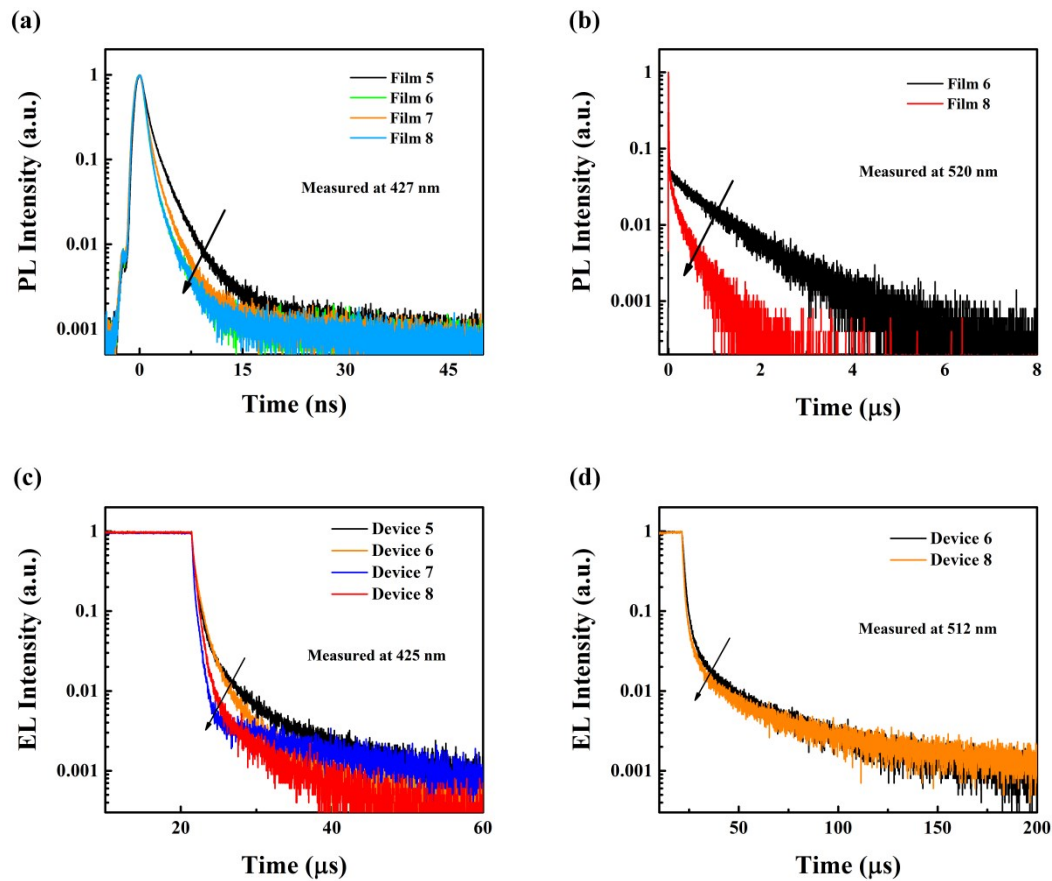

**Fig. S5** (a) Transient PL decay characteristics of films 5, 6, 7 and 8 at the 4P-NPB/Bepp<sub>2</sub> PL emission wavelength of 427 nm. (b) Transient PL decay characteristics of films 6 and 8 at the Ir(ppy)<sub>3</sub> phosphor sensitizer PL emission wavelength of 520 nm. (c) Transient EL decay characteristics of devices 5, 6, 7 and 8 at 4P-NPB/Bepp<sub>2</sub> EL emission wavelength of 425 nm. (f) Transient EL decay characteristics of devices 6 and 8 at Ir(ppy)<sub>3</sub> phosphor sensitizer EL emission wavelength of 512 nm. The film structures are 4P-NPB (8 nm)/Bepp<sub>2</sub> (5 nm)/ X (5 nm)/ Bepp<sub>2</sub> (10 nm), where X are Bepp<sub>2</sub>, Bepp<sub>2</sub>:6%Ir(ppy)<sub>3</sub>, Bepp<sub>2</sub>:2%TBRb and Bepp<sub>2</sub>:6%Ir(ppy)<sub>3</sub>:2%TBRb corresponding to films 5, 6, 7 and 8, respectively. The device structures are ITO/HAT-CN (15 nm)/TAPC (60 nm)/TCTA (5 nm)/4P-NPB (8 nm)/Bepp<sub>2</sub> (5 nm)/ Y (5 nm)/Bepp<sub>2</sub> (40 nm)/LiF (1 nm)/Al, where Y are Bepp<sub>2</sub>, Bepp<sub>2</sub>:6%Ir(ppy)<sub>3</sub>, Bepp<sub>2</sub>:2%TBRb and Bepp<sub>2</sub>:6%Ir(ppy)<sub>3</sub>:2%TBRb, corresponding to devices 5, 6, 7 and 8, respectively.

## 1. Calculation of Förster energy transfer (FET)

$$R_0^6 = \left( \frac{9000(\ln 10)\kappa^2\Phi_D}{128\pi^5 N_A n^4} \right) \int_0^\infty F_D(\lambda)\varepsilon_A(\lambda)\lambda^4 d\lambda \quad (S1)$$

Where  $R_0$  is the Förster energy transfer radius,  $\kappa^2$  is the orientation factor usually assuming to be 2/3,  $n$  is the refractive index about 1.7,  $\Phi_D$  is the PLQY of donor,  $N_A$  is the Avogadro's number, and

$\int_0^\infty F_D(\lambda)\varepsilon_A(\lambda)\lambda^4 d\lambda$  is the spectral overlap integral between the PL spectrum of host and the absorption spectrum of guest.

$$K_{ET} = \frac{1}{\tau_D} \left( \frac{R_0}{R_{DA}} \right)^6 \quad (S2)$$

$$\eta_{ET} = \frac{K_{ET}}{K_{ET} + \frac{1}{\tau_D}} = \frac{1}{1 + \left( \frac{R_0}{R_{DA}} \right)^6} \quad (S3)$$

Where  $\tau_D$  is the decay lifetime of host without the guest,  $R_0$  is the Förster energy transfer radius and  $R_{DA}$  is the distant between host and guest. And  $R_{DA}$  can be calculated by using:

$$R_{DA} = \left( N_G \times \frac{4\pi}{3} \right)^{-\frac{1}{3}} \quad (S4)$$

$$N_G = \beta \times \rho \times N_A / M_C \quad (S5)$$

Where  $N_G$  is the quantity of guest material in a unit volume,  $\beta$  is the fraction of the guest material,  $\rho$  is the density of the film assuming to be 1 g cm<sup>-3</sup>,  $N_A$  is the Avogadro's number and  $M_C$  is the molecular weight of the guest material.

## 2. Calculation of Dexter energy transfer rate constant (DXT)

$$K_{DT} = \frac{2\pi}{h} C^2 J e^{-2R_{DA}/L} \quad (S6)$$

Where C is a constant in the units of energy,  $R_{DA}$  is the intermolecular distance between host and guest and L is their van der Waals radii.
